# Supplementary material for: Optimized atomic layer deposition of homogeneous, conductive Al2O3 coatings for high-nickel NCM containing ready-to-use electrodes
Source: Royal Society of Chemistry journal article supplement (doi:10.1039/d0cp06422j), 2021-01-01
Supplement: d0cp06422j1.pdf [file d0cp06422j1.pdf]

## Supporting Information

### **Optimized atomic layer deposition of homogeneous, conductive Al<sub>2</sub>O<sub>3</sub> coatings for high-nickel NCM containing ready-to-use electrodes**

R. S. Negi<sup>a</sup>, S. P. Culver<sup>b</sup>, M. Wiche<sup>a</sup>, S. Ahmed<sup>c</sup>, K. Volz<sup>c</sup>, and M.T. Elm<sup>a,b,d\*</sup>

<sup>a</sup>*Center for Materials Research (LaMa), Justus Liebig University Giessen, Heinrich-Buff-Ring 16, 35392 Giessen, Germany*

<sup>b</sup>*Institute of Physical Chemistry, Justus Liebig University Giessen, Heinrich-Buff-Ring 17, 35392 Giessen, Germany*

<sup>c</sup>*Materials Science Centre and Faculty of Physics, Philipps University Marburg, Hans-Meerwein-Strasse 6, 35043 Marburg, Germany*

<sup>d</sup>*Institute of Experimental Physics I, Justus Liebig University Giessen, Heinrich-Buff-Ring 16, 35392 Giessen, Germany*

#### **Corresponding Authors**

\*Email: [matthias.elm@phys.chemie.uni-giessen.de](mailto:matthias.elm@phys.chemie.uni-giessen.de)

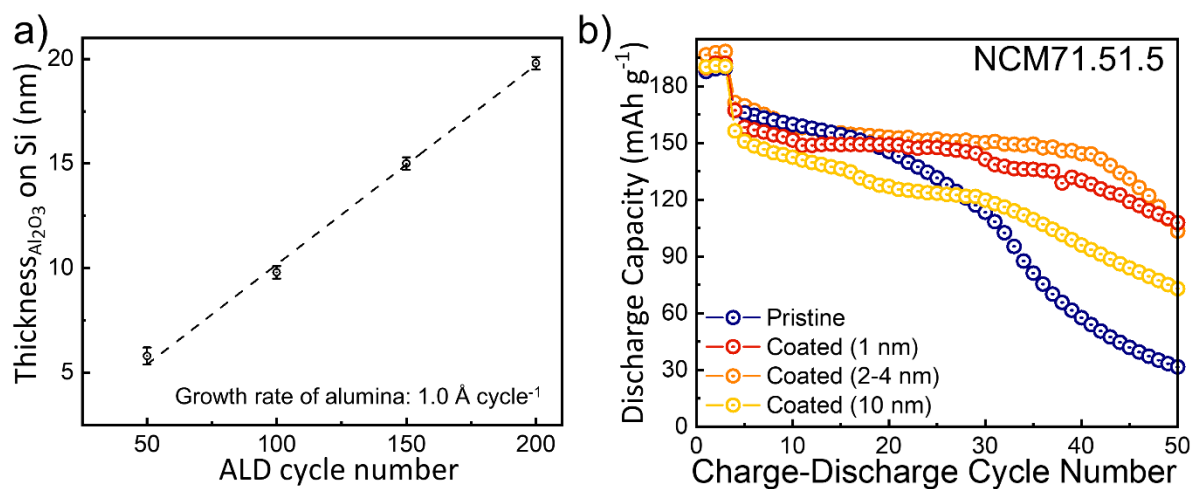

Fig. S1: (a) Thickness of the  $\text{Al}_2\text{O}_3$  layer as a function of the number of ALD cycles deposited on Si substrates. The thickness was determined using XRR. The determined growth rate is about  $1 \text{ \AA}$  per cycle. (b) Comparison of the long-term cycling stability for pristine and coated samples (NCM71.51.5) with different coating thicknesses.

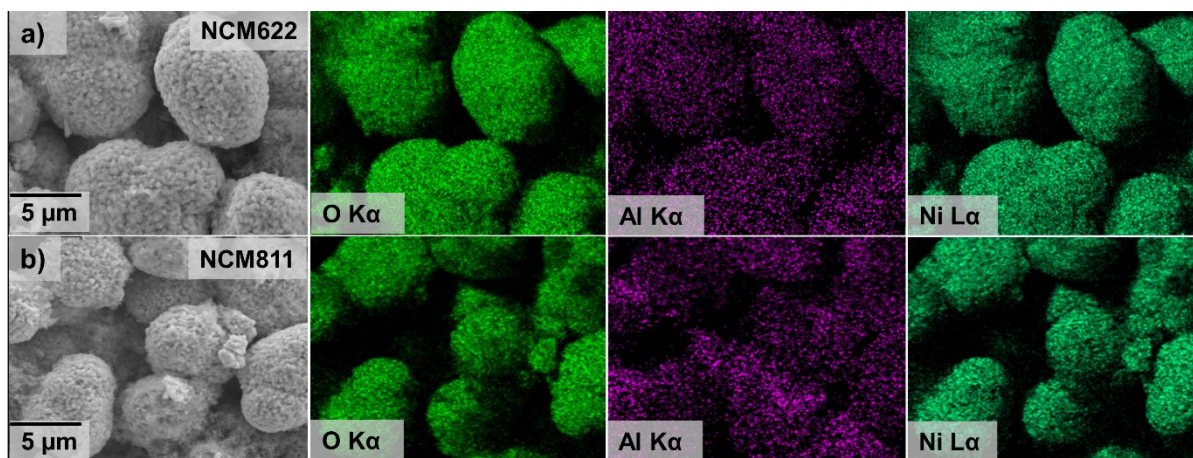

Fig. S2: SEM-EDX mapping of  $\text{Al}_2\text{O}_3$  coated (a) NCM622, and (b) NCM811

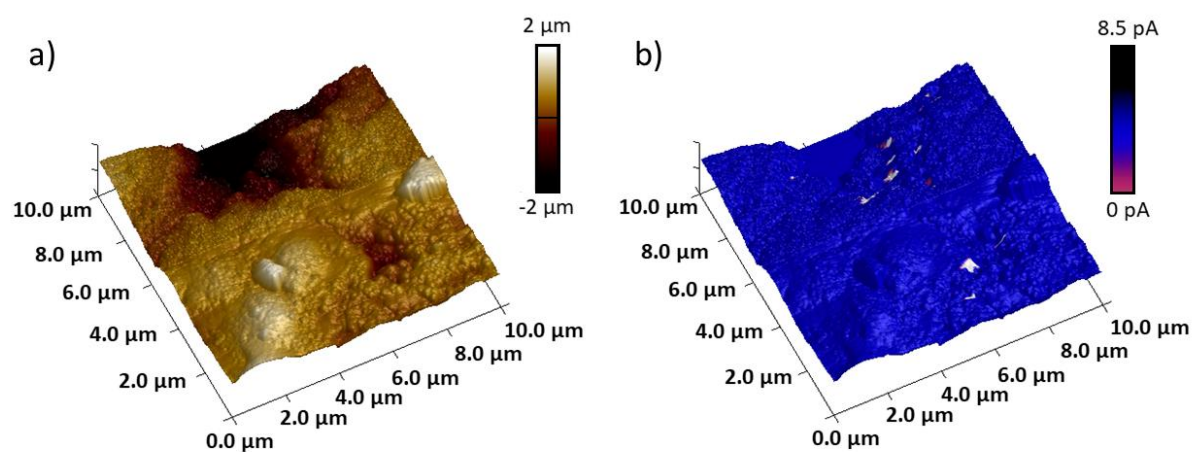

*Fig. S3: a) AFM and b) C-AFM measurements of a NCM71.51.5 cathode coated with 20 nm  $\text{Al}_2\text{O}_3$  revealing the insulating properties of the coating layer.*

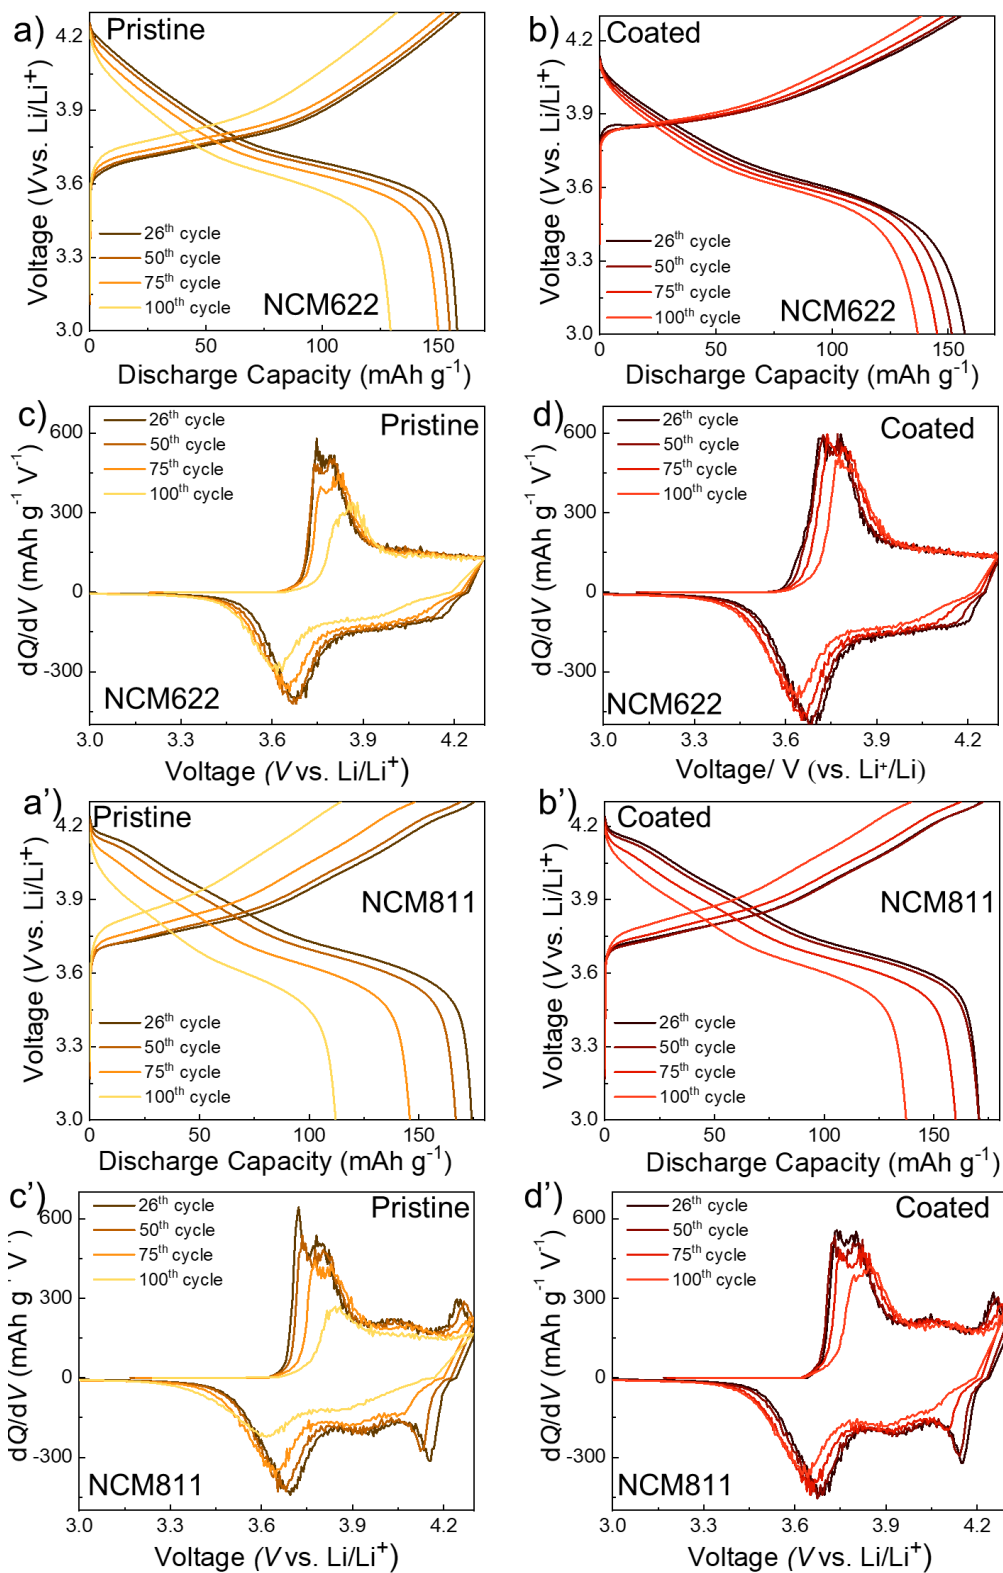

Fig. S4: Galvanostatic charge-discharge curves and corresponding Differential capacity plots of pristine and coated (a,b,c,d) NCM622 and (a',b',c',d') coated NCM811 cycled at 0.5 C after the C-rate test.

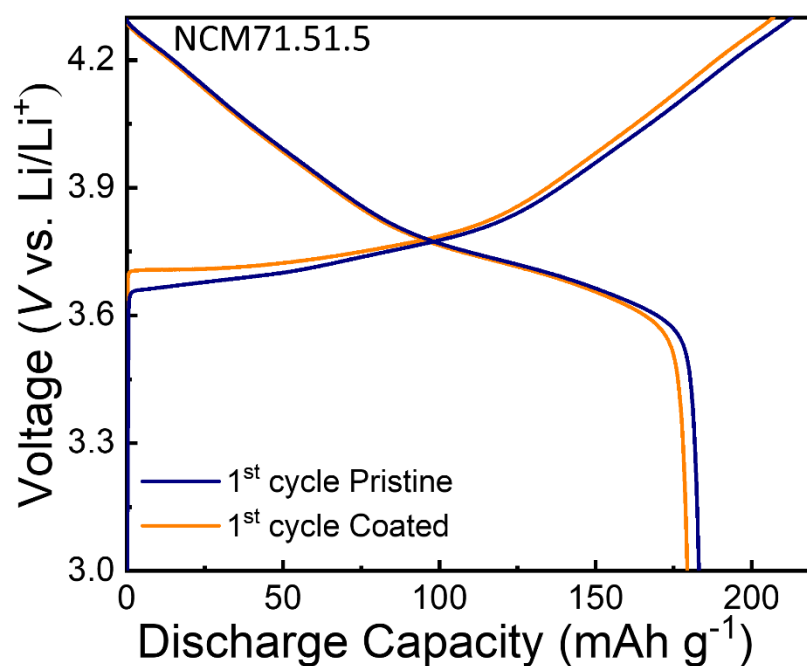

Fig. S5: Comparison of galvanostatic charge-discharge curves for 1<sup>st</sup> cycles at 0.1C for pristine cathode and coated cathode.

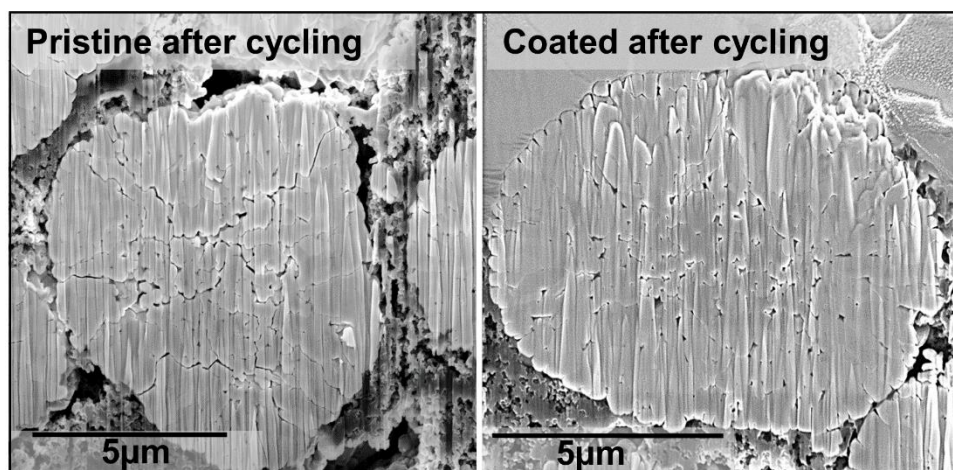

Fig. S6: Cross-sectional SEM micrographs of Pristine and Coated NCM71.51.5 after long-term cycling.
